# Supplementary material
Source: PubMed Central journal article supplement (PMC4330581)
Supplement: supp_tpc.114.133991_tpc133991_Supplemental.pdf [file supp_tpc.114.133991_tpc133991_Supplemental.pdf]

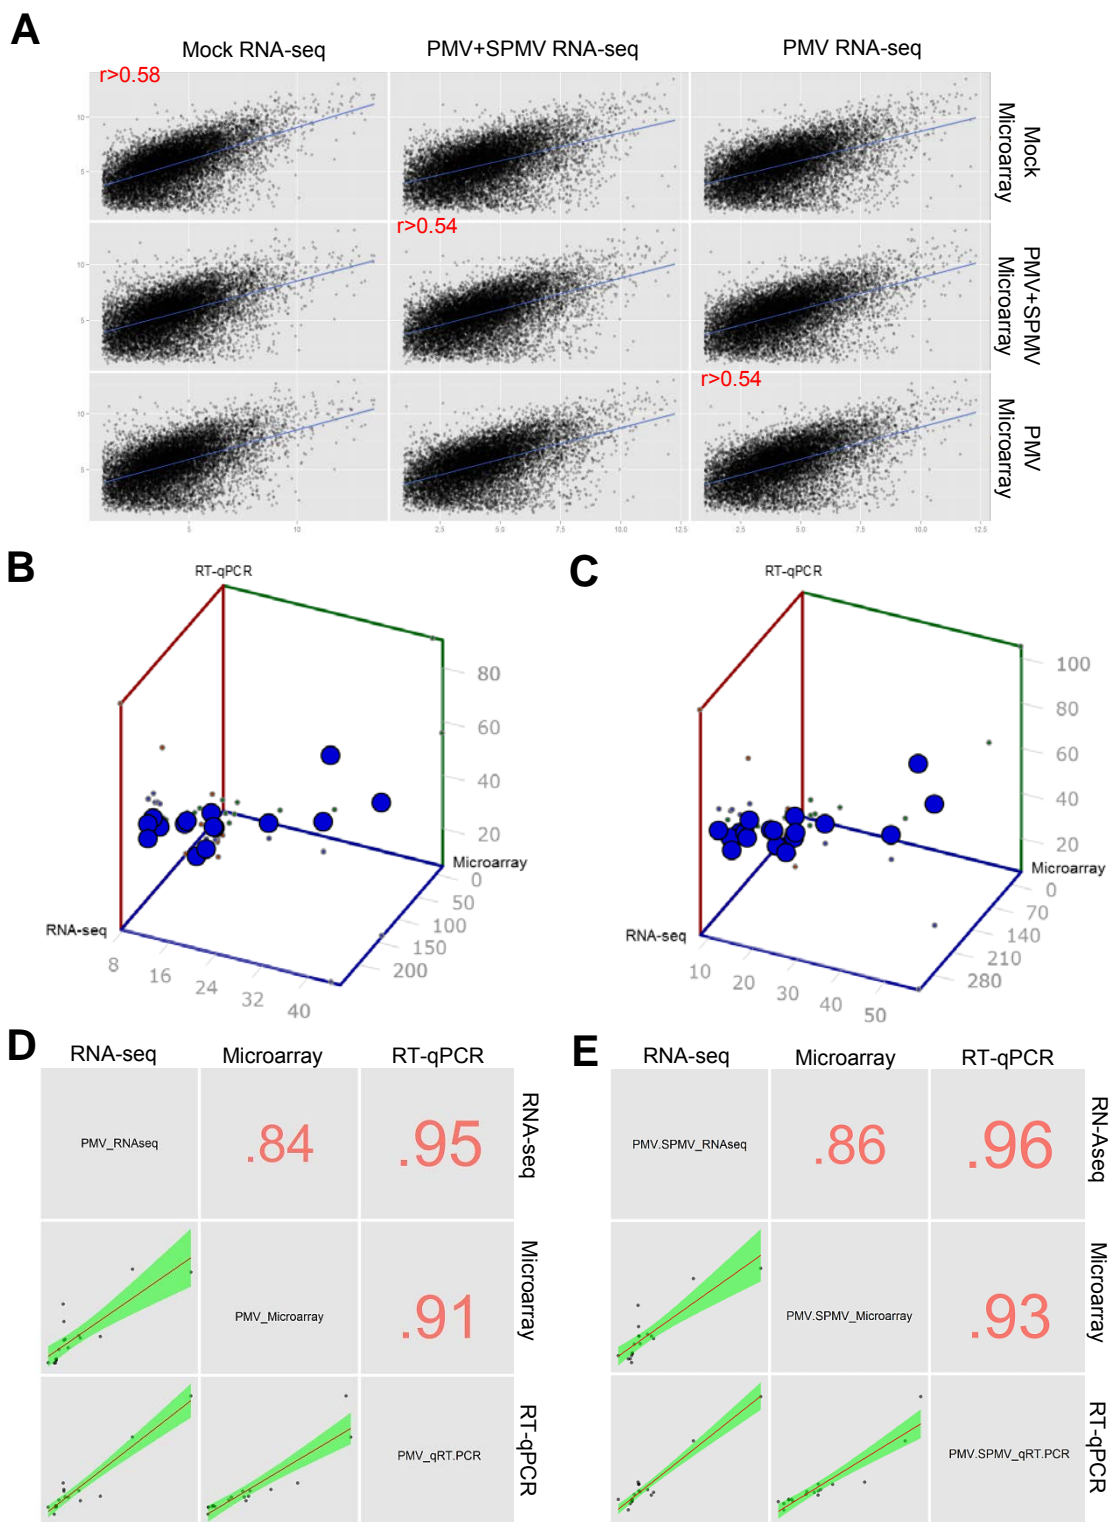

**Supplemental Figure 1.** Validation of RNA-seq expression data. (A) Expression of ~11,500 gene models as determined by RNA-seq (FPKM  $\geq 2$ ) was compared to their corresponding expression in microarrays (Mandadi and Scholthof, 2012). Pearson product-moment correlation coefficient ( $r$ ) values of RNA-seq and microarray data was  $>0.54$ , indicating a high degree of correlation. Fold-change expression of 18 genes mis-expressed in (B) PMV-, and (C) PMV+SPMV-infection relative to mock, determined using RNA-seq, microarray and RT-qPCR analysis, were clustered in a multivariate three-dimensional scatter plot. (D, E) The “ $r$ ” coefficient values for bivariate comparisons between the three datasets show strong correlation between RNA-seq, microarray and RT-qPCR results. Together, these analyses support the use of RNA-seq methodology for transcriptome analysis, and revealed strong correlation with RT-qPCR and the microarray-based analysis.

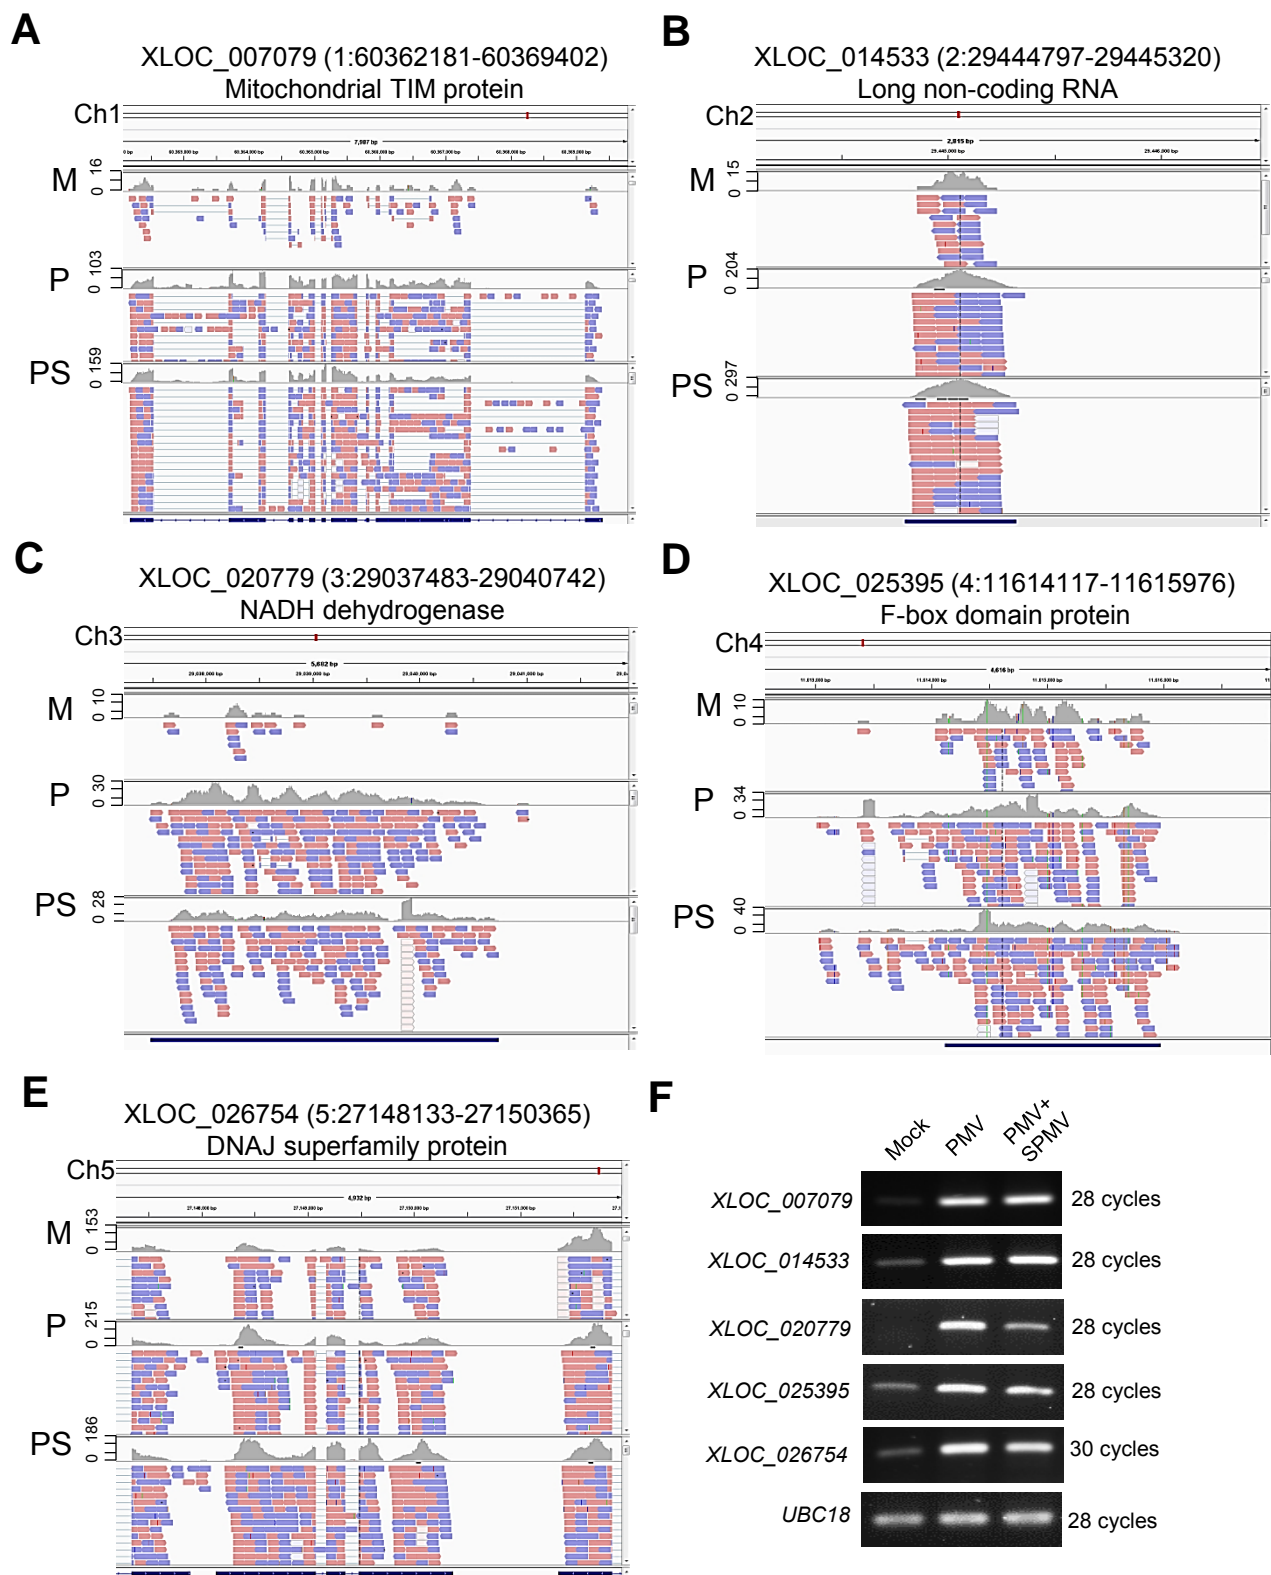

**Supplemental Figure 2.** Select examples of novel gene loci activated in virus-infected *Brachypodium*. Read densities (y-axis) of (A) XLOC\_007079, (B) XLOC\_014533, (C) XLOC\_020779, (D) XLOC\_025395 and (E) XLOC\_026754 in mock (M), PMV (P) and PMV+SPMV (PS) are plotted against predicted gene models (x-axis) using the Integrative Genomics Viewer (IGV) visualization tool. Chromosomal loci and predicted BLASTX match (E-value cutoff:  $1e-10$ ) of the novel genes are indicated on top of each IGV panel. (F) RT-PCR analysis was performed to validate the expression of the selected novel genes induced in PMV- and PMV+SPMV-infected plants. *UBC18* was used as control for approximately equal cDNA amounts among the samples.

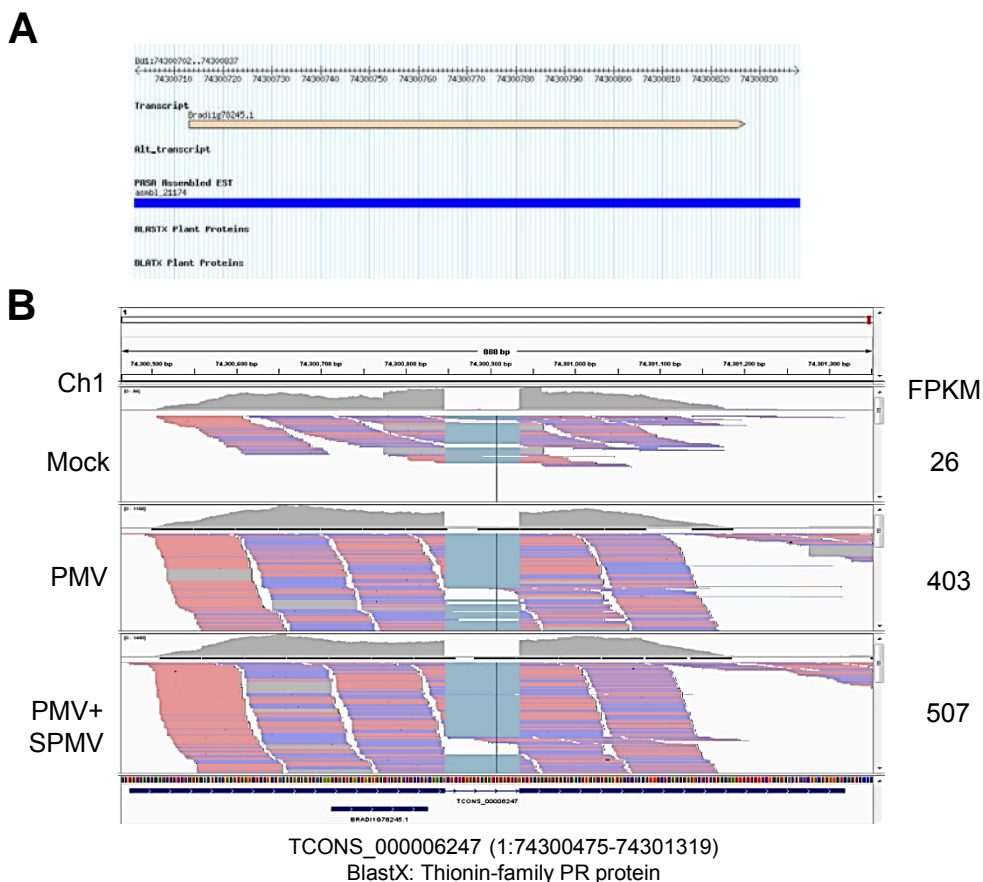

**Supplemental Figure 3.** Select example of a novel splice junctions identified in the RNA-seq analysis. (A) Brachypodium reference gene model for Bradi1g78245.1 showing a single exon encoding a protein with no predicted functions. (B) Cufflinks-assembled transcript model for Bradi1g78245. Read coverage (y-axis) of Bradi1g78245 in mock, PMV- and PMV+SPMV-infected samples was plotted against predicted Cufflinks transcript model and splice junctions (x-axis) using Integrative Genomics Viewer. The chromosomal locus of the novel transcript model is indicated at the bottom. BLASTX analysis (E-value:  $1e-10$ ) revealed this gene to encode a thionin-family Pathogenesis Related (PR) protein.

**Supplemental Table 1.** Cloning and sequencing of Bd-SCL33 splice-variants.

| <b>Splice variant ID</b> | <b>Transcript length (nt)</b> | <b>Splicing pattern</b>                                       | <b>Predicted protein (aa)</b> |
|--------------------------|-------------------------------|---------------------------------------------------------------|-------------------------------|
| 7                        | 3048                          | Full-length pre-mRNA                                          | 9                             |
| 6                        | 2417                          | Intron3 retention (nt 1-496 ) + Intron1 retention (nt 1-872 ) | 9                             |
| 5                        | 1545                          | Intron3 retention (nt 1-496 )                                 | 75                            |
| 4                        | 1315                          | Intron3 retention (nt 231-496 )                               | 78                            |
| 3                        | 1157                          | Intron3 retention (nt 231-338 )                               | 78                            |
| Bradi1g61330.2           | 1049                          | Bradi1g61330.2                                                | 219                           |
| Bradi1g61330.1           | 1135                          | Primary transcript                                            | 246                           |

**Supplemental Table 2.** Cuffcompare summary of locus-level sensitivity and specificity match scores of the Cufflinks transcript assemblies to reference Brachypodium (Bd21 v1.2) assembly.

|                    | <b>Sn</b> | <b>Sp</b> | <b>fSn</b> | <b>fSp</b> |
|--------------------|-----------|-----------|------------|------------|
| <b>Mock</b>        |           |           |            |            |
| Base level         | 100       | 91.6      | -          | -          |
| Exon level         | 100.5     | 88.9      | 100        | 90         |
| Intron level       | 100       | 92.3      | 100        | 93.6       |
| Intron chain level | 96.5      | 74.6      | 100        | 88         |
| Transcript level   | 96.9      | 74.1      | 93.5       | 71.5       |
| Locus level        | 97.3      | 90.5      | 100        | 92.9       |
| <b>PMV</b>         |           |           |            |            |
| Base level         | 100       | 91.1      | -          | -          |
| Exon level         | 100.5     | 88.3      | 100        | 89.4       |
| Intron level       | 100       | 92        | 100        | 93.2       |
| Intron chain level | 96.3      | 74.1      | 100        | 87.5       |
| Transcript level   | 96.8      | 73.3      | 93.3       | 70.7       |
| Locus level        | 97.1      | 90        | 100        | 92.4       |
| <b>PMV+SPMV</b>    |           |           |            |            |
| Base level         | 100       | 90        | -          | -          |
| Exon level         | 100.7     | 87.3      | 100        | 88.4       |
| Intron level       | 100       | 91.6      | 100        | 92.9       |
| Intron chain level | 96.4      | 72.2      | 100        | 85.3       |
| Transcript level   | 96.9      | 71.2      | 93.5       | 68.7       |
| Locus level        | 97.3      | 89.2      | 100        | 91.5       |

Sn-Sensitivity, Sp-Specificity, fSn-fuzzy sensitivity, fSp-fuzzy specificity

**Supplemental Table 3.** Primers used in this study.

| <b>Primer</b>        | <b>Sequence (5' to 3')</b> |
|----------------------|----------------------------|
| XLOC_007079 Forward  | TGCGACAGAAGGATGCTGAA       |
| XLOC_007079 Reverse  | GTCAGGATGGCTCACCCAAA       |
| XLOC_014533 Forward  | TATTTCTTCCCCTGCCCCCT       |
| XLOC_014533 Reverse  | GGCTTGTAGGCGCACAAAAT       |
| XLOC_020779 Forward  | TGAAGTAATGCGAGCGTGGT       |
| XLOC_020779 Reverse  | ACGGCTGAGTCGATTCTTGG       |
| XLOC_025395 Forward  | TAGCAACCCACGTTCCAACC       |
| XLOC_025395 Reverse  | ACTTTGGCAAGTCCGTCGAT       |
| XLOC_026754 Forward  | AAGCTTCCCACCATTCGGG        |
| XLOC_026754 Reverse  | TACAGGTCGTACTIONCCGTCGT    |
| Bradi1g61330 Forward | CCTGTCCAAGCAGTACGCAG       |
| Bradi1g61330 Reverse | GGAATAGAGCGCAGCACAG        |
| Bradi4g00660 Forward | ACAGCAATGGCCACATCTGTTTAG   |
| Bradi4g00660 Reverse | TTGTCTTGCGGACGTTGCTTTG     |
